# Supplementary material for: Preharvest Elicitors as a Tool to Enhance Bioactive Compounds and Quality of Both Peel and Pulp of Yellow Pitahaya (Selenicereus megalanthus Haw.) at Harvest and during Postharvest Storage
Source: MDPI journal article supplement (doi:10.3390/ijms25105435), 2024-05-16

**Figure S1.** Distribution of the pitahaya plants in 3 blocks at random for the elicitor applications.

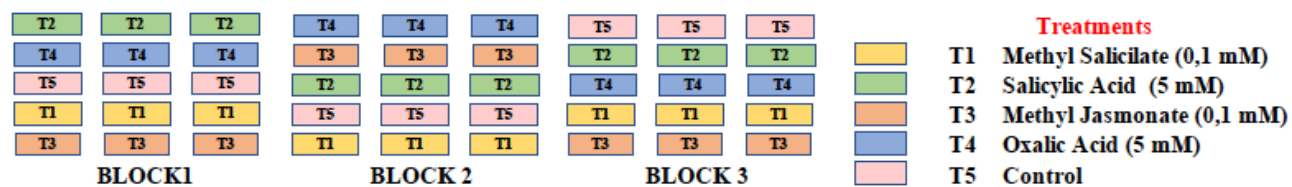

Supplement: s1 [file s1]
